# Supplementary material for: Deliberate construction of direct Z-scheme photocatalysts through photodeposition
Source: Royal Society of Chemistry journal article supplement (doi:10.1039/c9ta05607f), 2019-01-01
Supplement: c9ta05607f1.pdf [file c9ta05607f1.pdf]

## Supporting Information

### Purposely constructing direct Z-scheme photocatalyst by photo-deposition technique

Wenshuai Jiang,<sup>a</sup> Dan Qu,<sup>\*a</sup> Li An,<sup>a</sup> Xiang Gao,<sup>a</sup> Yuanjing Wen,<sup>a</sup> Xiayan Wang,<sup>a</sup> Zaicheng

Sun<sup>\*a</sup>

- a. Center of Excellence for Environmental Safety and Biological Effects, Beijing Key Laboratory for Green Catalysis and Separation, Department of Chemistry and Chemical Engineering, College of Environmental and Energy Engineering, Beijing University of Technology, Beijing, 100124, P. R. China.

Email: [sunzc@bjut.edu.cn](mailto:sunzc@bjut.edu.cn) and [danqu@bjut.edu.cn](mailto:danqu@bjut.edu.cn)

# Content

|                         |    |
|-------------------------|----|
| <i>Scheme S1</i> .....  | 1  |
| <i>Scheme S2</i> .....  | 1  |
| <i>Fig. S1</i> .....    | 2  |
| <i>Fig. S2</i> .....    | 2  |
| <i>Fig. S3</i> .....    | 3  |
| <i>Fig. S4</i> .....    | 3  |
| <i>Fig. S5</i> .....    | 4  |
| <i>Fig. S6</i> .....    | 5  |
| <i>Fig. S7</i> .....    | 5  |
| <i>Fig. S8</i> .....    | 6  |
| <i>Fig. S9</i> .....    | 6  |
| <i>Fig. S10</i> .....   | 7  |
| <i>Fig. S11</i> .....   | 7  |
| <i>Fig. S12</i> .....   | 8  |
| <i>Fig. S13</i> .....   | 8  |
| <i>Fig. S14</i> .....   | 9  |
| <i>Fig. S15</i> .....   | 9  |
| <i>Fig. S16</i> .....   | 10 |
| <i>Fig. S17</i> .....   | 10 |
| <i>Fig. S18</i> .....   | 11 |
| <i>Table S1</i> .....   | 12 |
| <i>References</i> ..... | 14 |

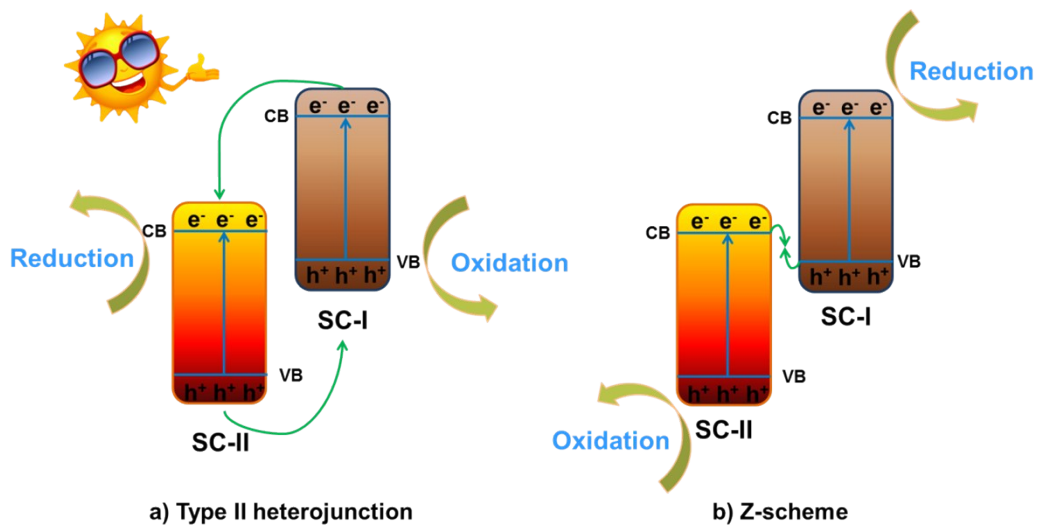

**Scheme S1.** Schematic of the charge-carrier separation and mechanism on the type II heterojunction (a) and the direct Z-scheme (b) composed with two different semiconductors (SC-I and SC-II).

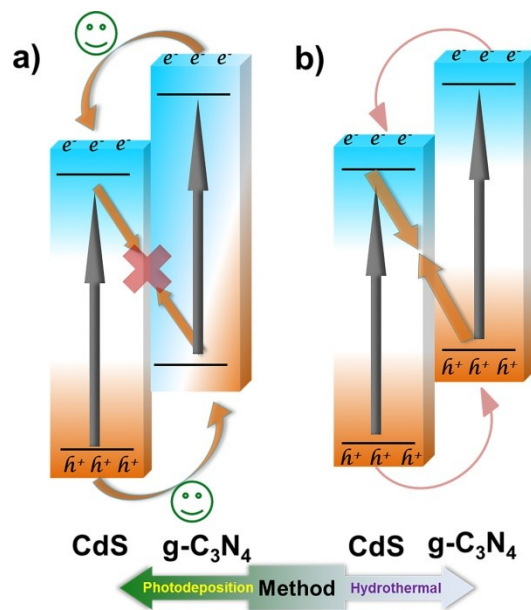

**Scheme S2.** Schematic of the charge-carrier separation and mechanism of g-C<sub>3</sub>N<sub>4</sub>/CdS composites synthesized by the methods of photodeposition (a) and hydrothermal (b), respectively.<sup>1</sup>

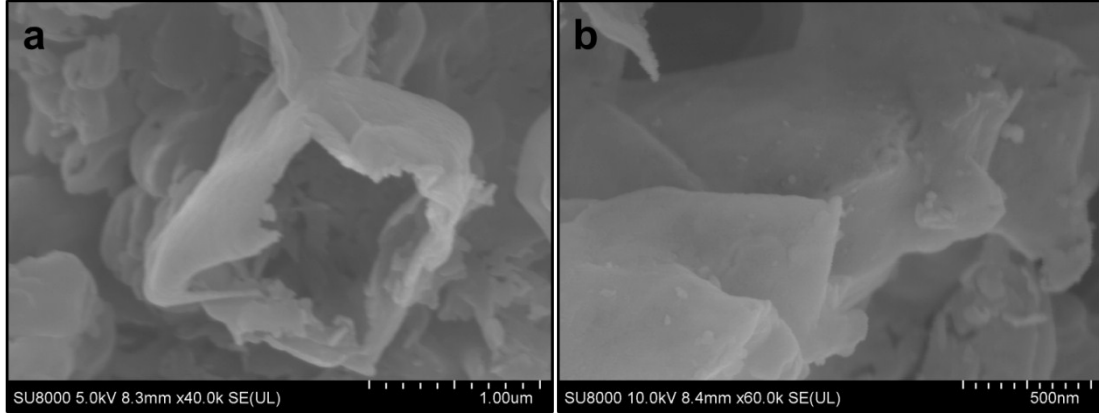

**Fig. S1.** The SEM of g-C<sub>3</sub>N<sub>4</sub> nanosheets (a) and 5%-FCN (b)

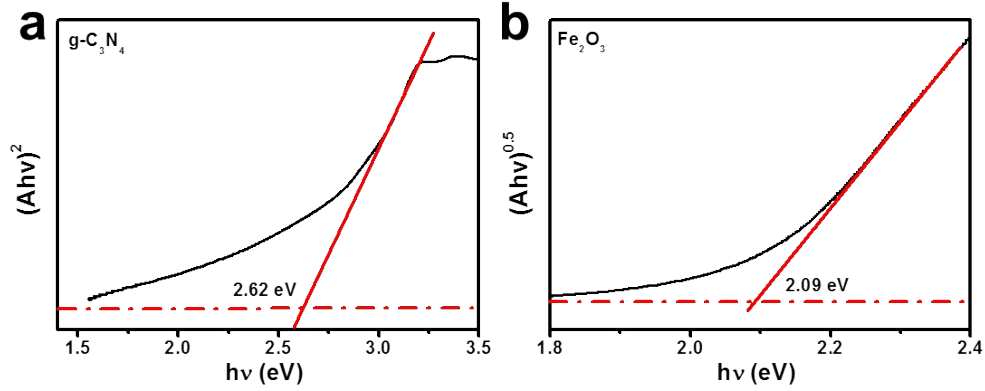

**Fig. S2.** Tauc-plot of the  $(Ahv)^2$  versus  $hv$  for g-C<sub>3</sub>N<sub>4</sub> (a) and the  $(Ahv)^{0.5}$  versus  $hv$  for Fe<sub>2</sub>O<sub>3</sub> (b).

In general, the band edge positions of CB and VB of a semiconductor can be determined using Tauc-plot method.<sup>2</sup> The conduction band (CB) edge of a semiconductor at zero charge can be determined using the following equation:

$$E_{CB} = \chi - E^e - 1/2E_g \quad (1)$$

$$E_{VB} = E_g + E_{CB} \quad (2)$$

Where,  $E_{CB}$  is the CB edge potential,  $E_{VB}$  is the valance band (VB) edge potential, and  $\chi$  is the electronegativity of the semiconductor, expressed as the geometric mean of the absolute electronegativity of the constituent atoms, which is defined as the arithmetic mean of the atomic electron affinity and the first ionization energy.  $E^e$  is the energy of free electrons on the hydrogen scale  $\approx 4.5$  eV and  $E_g$  is the band gap of the semiconductor.

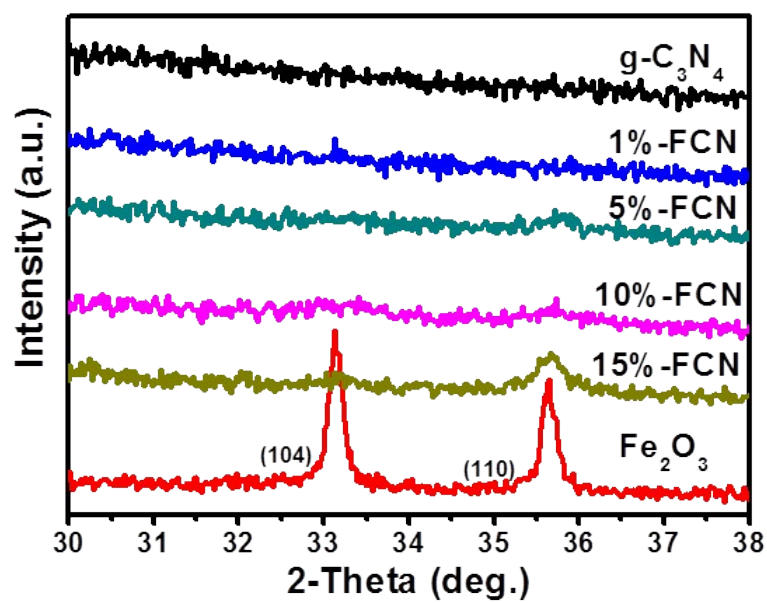

Fig. S3. The XRD patterns of g-C<sub>3</sub>N<sub>4</sub>, Fe<sub>2</sub>O<sub>3</sub> and x%-FCN samples.

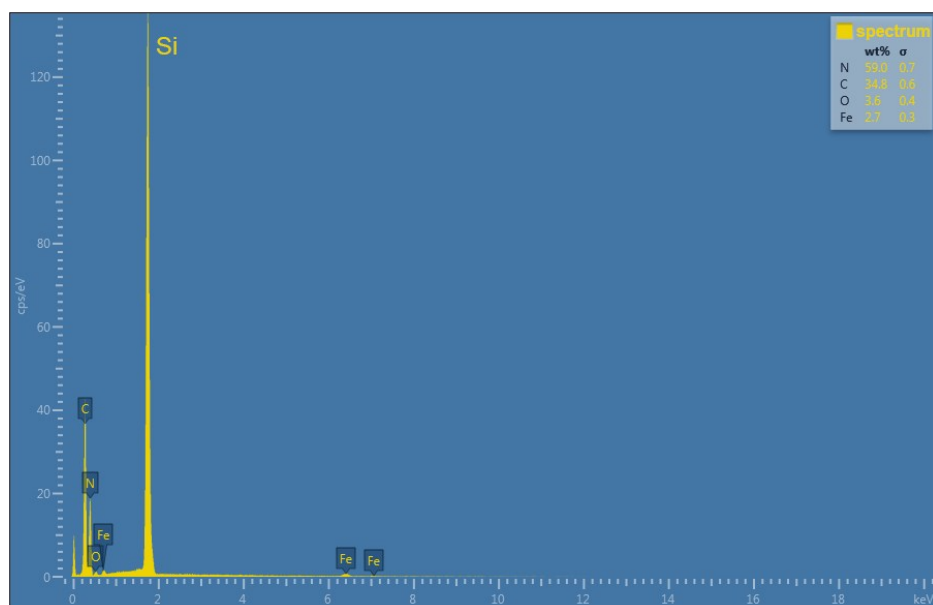

Fig. S4. The EDS spectrum of 5%-FCN

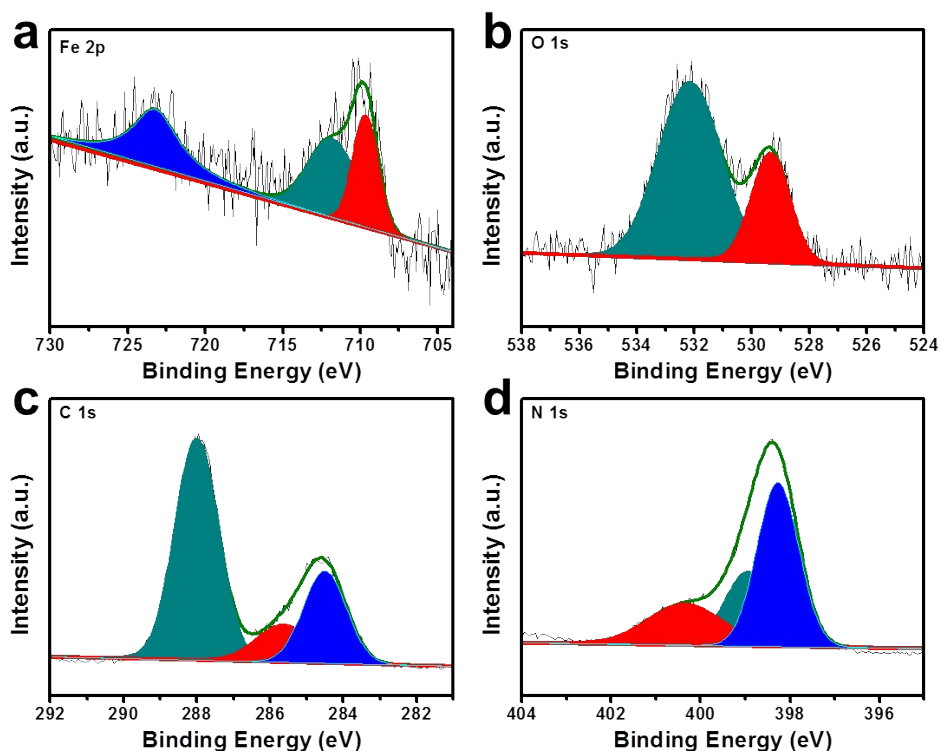

**Fig. S5.** XPS high-resolution spectrum of (a) Fe 2p, (b) O 1s, (c) C 1s, (d) N 1s of the 5%-FCN.

To further prove the composition of the complex are Fe<sub>2</sub>O<sub>3</sub> and g-C<sub>3</sub>N<sub>4</sub>, high-resolution XPS spectra (Fig. S5) of N 1s, Fe 2p, and O 1s in the 5%-FCN were investigated. For the N1s spectrum, the peak can be break up into three peaks at 398.4, 398.9, and 400.5 eV, which can be ascribed to the occurrence of C-N=C groups, tertiary nitrogen N-(C)<sub>3</sub> groups, and N-H groups. Fe 2p exhibits two obvious peaks at 711.0 and 712.5, 724.5 eV, which correspond to Fe 2p<sub>3/2</sub>, Fe 2p<sub>3/2</sub> and Fe 2p<sub>1/2</sub>, respectively. The high-resolution spectrum of O 1s shows a peak at 529.9 eV, which is attributed to the lattice oxygen, and a peak at 532.6 eV, which is assigned to oxygen-containing intermediates derived from the incomplete thermal condensation of urea.

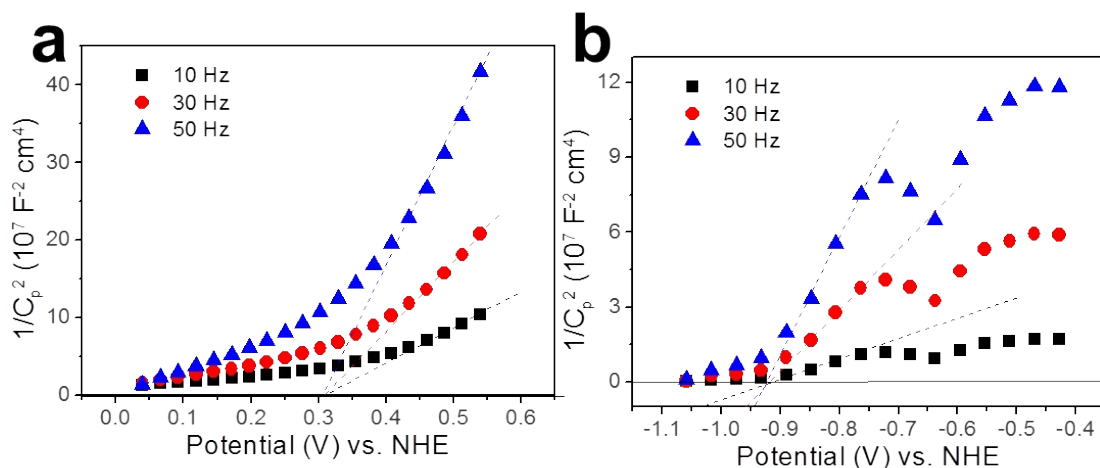

Fig. S6. Mott-schottky curve of  $\text{Fe}_2\text{O}_3$  (a) and  $\text{g-C}_3\text{N}_4$  (b)

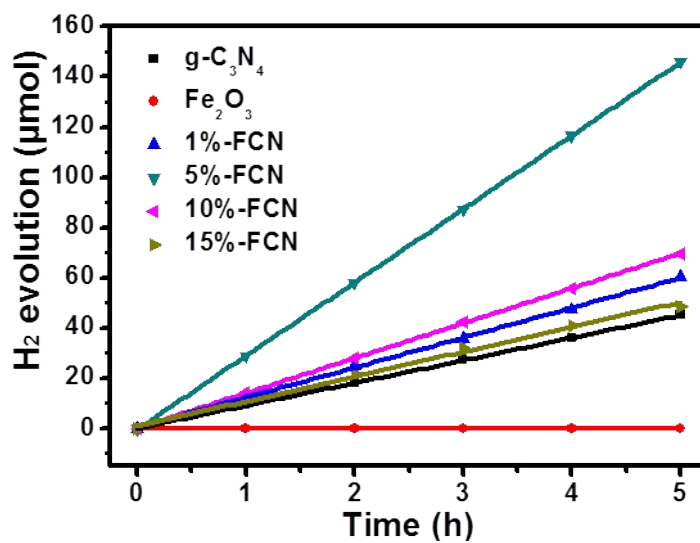

Fig. S7. The amount of  $\text{H}_2$  evolution with the x%-FCN samples,  $\text{g-C}_3\text{N}_4$  and  $\text{Fe}_2\text{O}_3$  under visible light ( $\lambda > 420 \text{ nm}$ ) with 50mg catalysts.

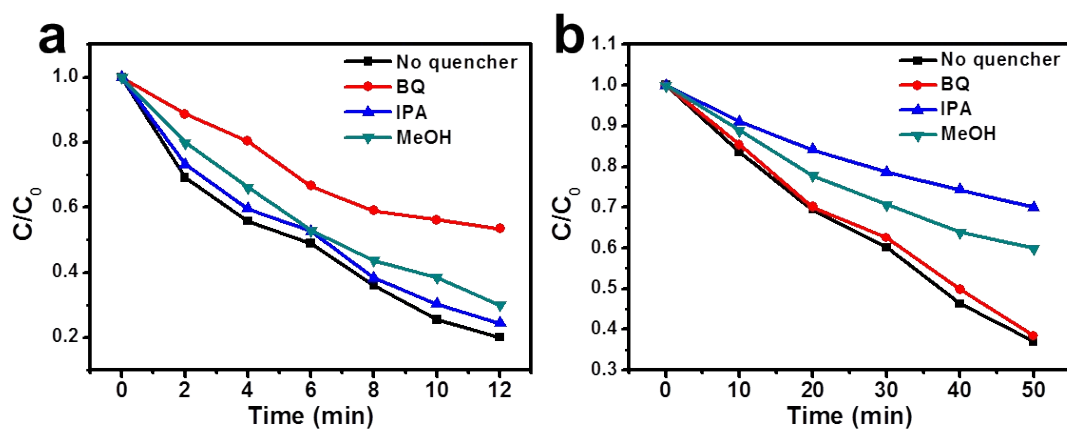

**Fig. S8.** Photocatalytic degradation of RhB aqueous solution over  $g-C_3N_4$  (a) and  $Fe_2O_3$  (b).

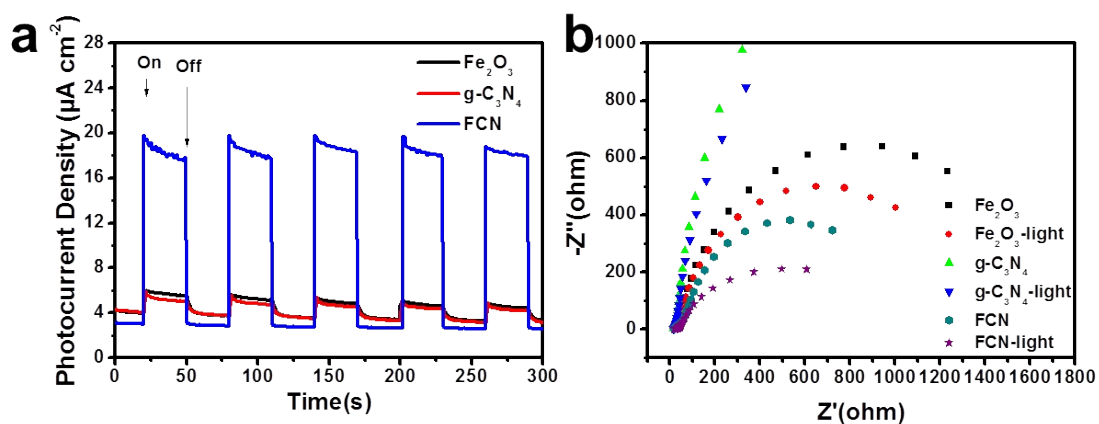

**Fig. S9.** (a). Transient photocurrents measurement of the  $g-C_3N_4$ ,  $Fe_2O_3$  and 5%-FCN samples; (b) Electrochemical impedance spectroscopy (EIS) of  $g-C_3N_4$ ,  $Fe_2O_3$  and 5%-FCN with/without light irradiation.



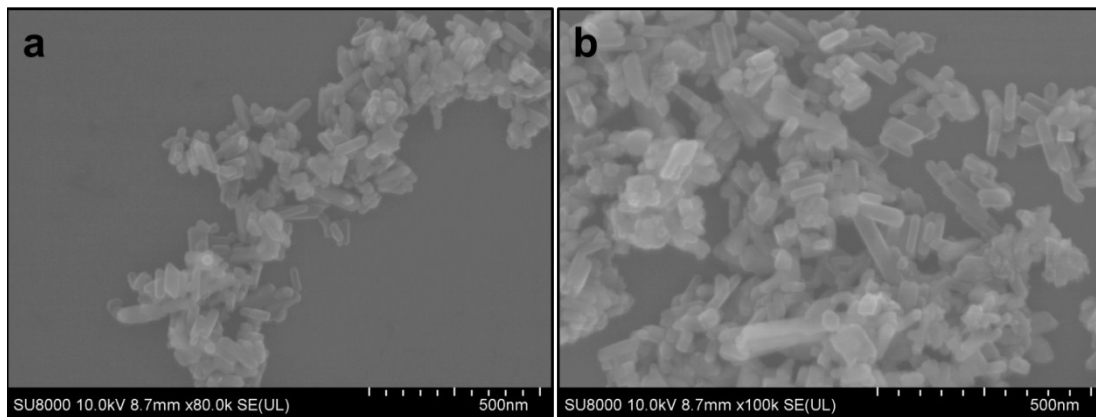

**Fig. S10.** The SEM of TiO<sub>2</sub> (a) and CdS/TiO<sub>2</sub> (b)

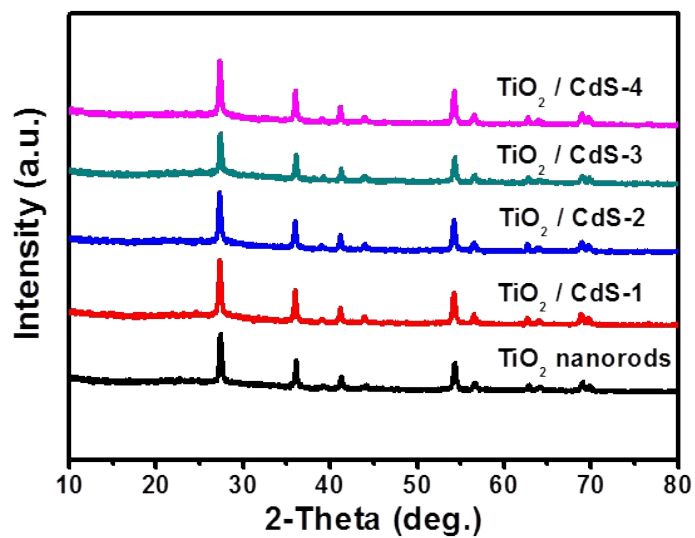

**Fig. S11.** The XRD of TiO<sub>2</sub> nanorods and CdS/TiO<sub>2</sub> samples

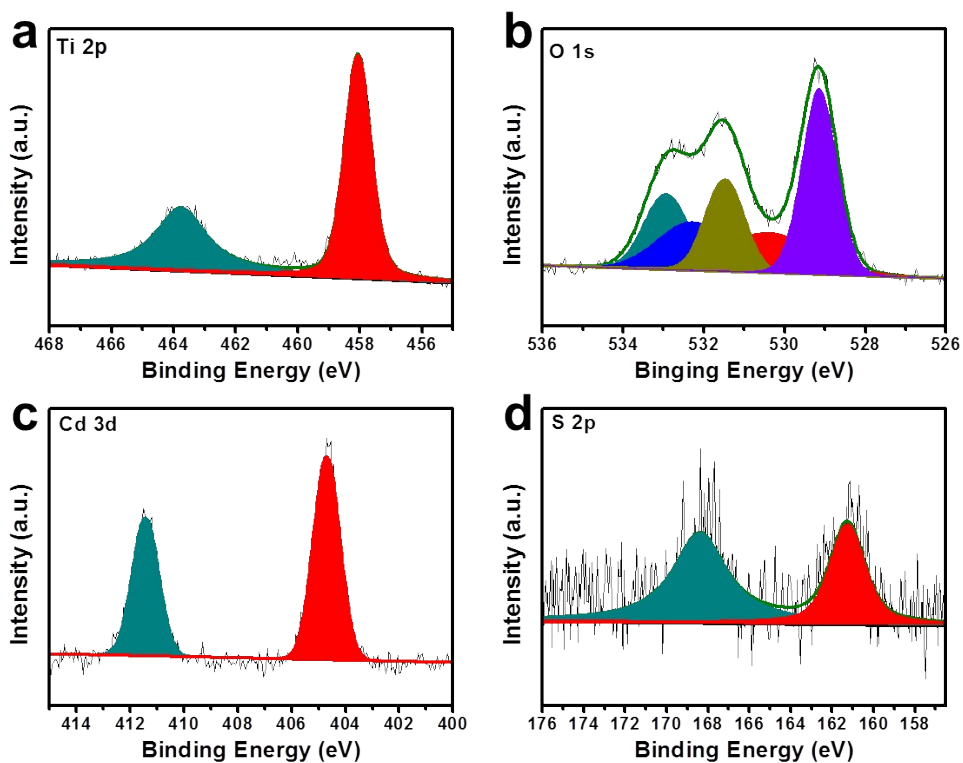

**Fig. S12.** XPS high-resolution spectrum of (a) Ti 2p, (b) O 1s, (c) Cd 3d, (d) S 2p of the CdS/TiO<sub>2</sub>.

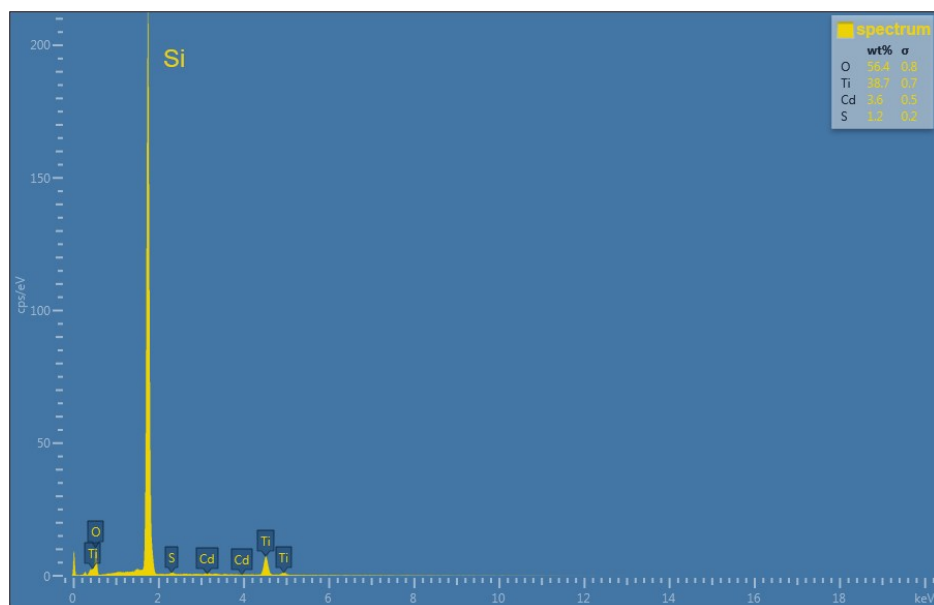

**Fig. S13.** The EDS spectrum of CdS/TiO<sub>2</sub>-3

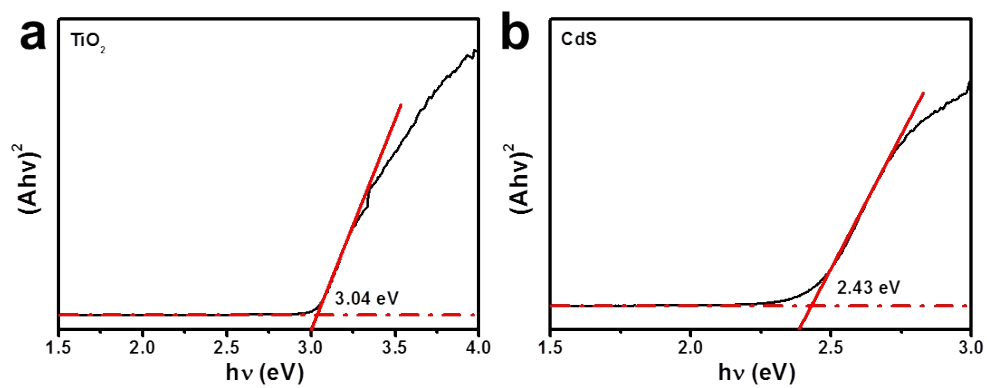

**Fig. S14.** Tauc-plot of the  $(Ah\nu)^2$  versus  $h\nu$  for  $\text{TiO}_2$  (a) and  $\text{CdS}$  (b).

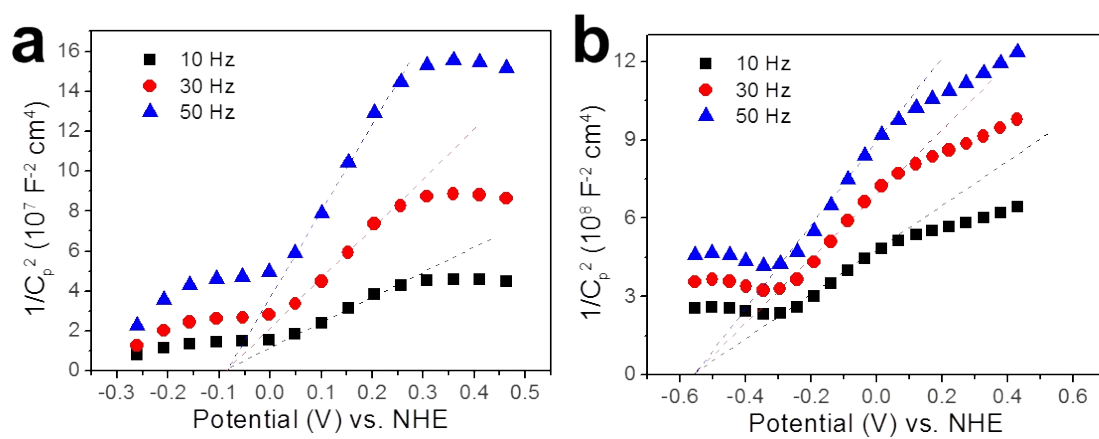

**Fig. S15.** Mott-schottky curve of  $\text{TiO}_2$  (a) and  $\text{CdS}$  (b)

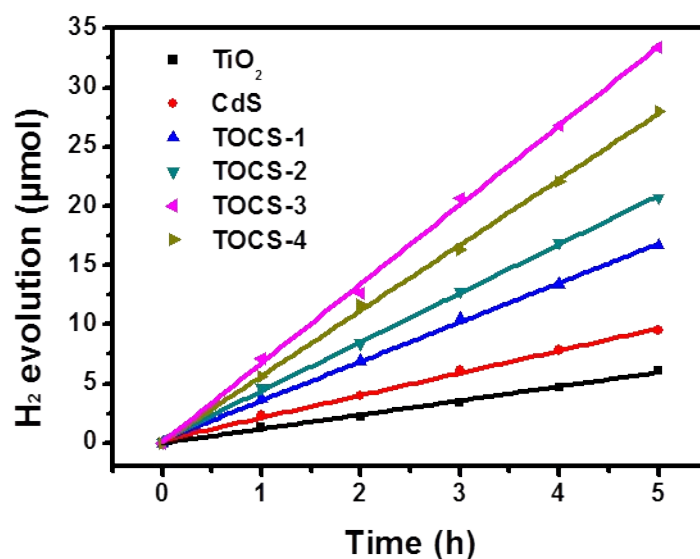

**Fig. S16.** The amount of H<sub>2</sub> evolution with the CdS/TiO<sub>2</sub> samples, TiO<sub>2</sub> and CdS under the light of  $\lambda > 400$  nm

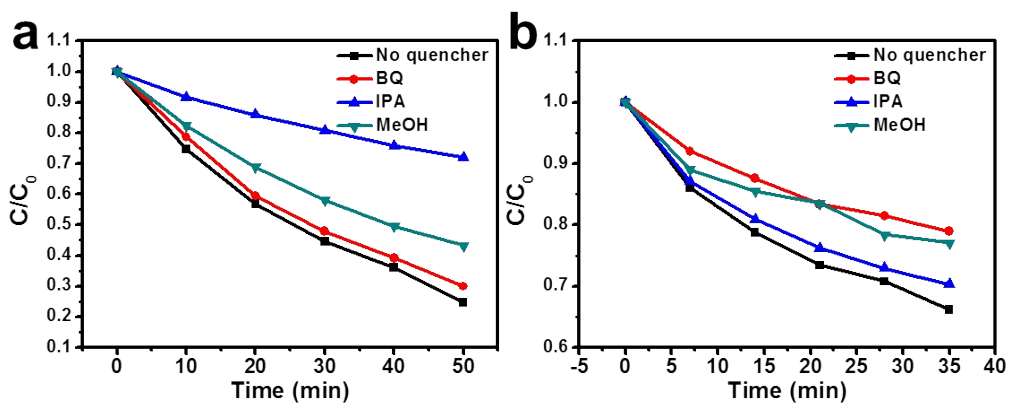

**Fig. S17.** Photocatalytic degradation of RhB aqueous solution by TiO<sub>2</sub> (a) and CdS (b).

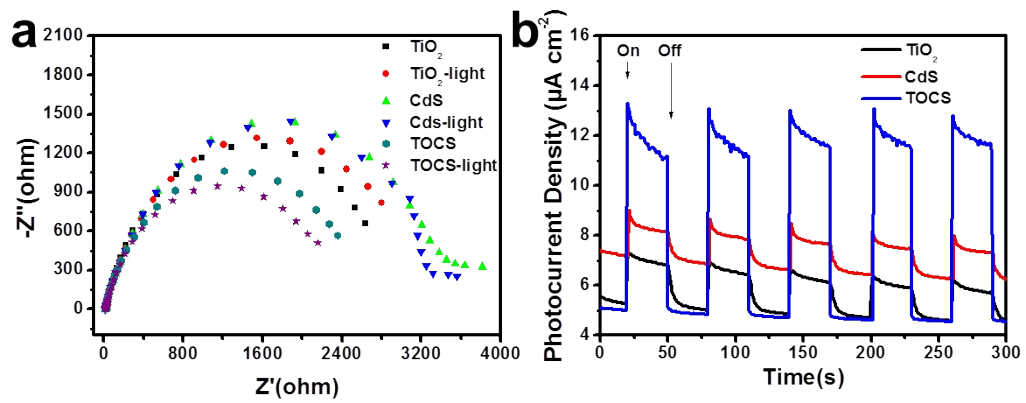

**Fig. S18.** (a). Transient photocurrents measurement of the  $\text{TiO}_2$ , CdS and CdS/ $\text{TiO}_2$ -3 samples; (b) Electrochemical impedance spectroscopy (EIS) of the  $\text{TiO}_2$ , CdS and CdS/ $\text{TiO}_2$ -3 with/without light irradiation.

**Table S1.** Summary of representative direct Z-scheme photocatalysts in water splitting

| Summary of representative direct Z-scheme photocatalysts in water splitting |             |                                 |                                                                                              |                                                              |                |      |
|-----------------------------------------------------------------------------|-------------|---------------------------------|----------------------------------------------------------------------------------------------|--------------------------------------------------------------|----------------|------|
| Catalyst                                                                    | Co-catalyst | Synthesis method                | Photocatalytic reaction conditions                                                           | Products and activity                                        | AQE (%)        | Refs |
| Anatase<br>TiO <sub>2</sub> /rutile TiO <sub>2</sub>                        | 0.6 wt% Pt  | Electrospinning and calcination | 350 W Xe lamp, methanol solution                                                             | H <sub>2</sub> : 324 μmol h <sup>-1</sup>                    | 20.9% (365 nm) | 3    |
| TiO <sub>2</sub> /WO <sub>3</sub>                                           | 0.45 wt% Pt | Electrospinning                 | 300 W Xe lamp, methanol solution                                                             | H <sub>2</sub> : 128.66 μmol h <sup>-1</sup> g <sup>-1</sup> |                | 4    |
| TiO <sub>2</sub> /WO <sub>3</sub>                                           | 0.45 wt% Au | Electrospinning                 | 300 W Xe lamp, methanol solution                                                             | H <sub>2</sub> : 296.63 μmol h <sup>-1</sup>                 |                | 5    |
| ZnO <sub>1-x</sub> /Zn <sub>0.2</sub> Cd <sub>0.8</sub> S                   | 0.1 wt% Pd  | Solid-state synthesis           | 300 W Xe lamp, λ > 420 nm, 0.1 M Na <sub>2</sub> S and 0.1 M Na <sub>2</sub> SO <sub>3</sub> | H <sub>2</sub> : 3779 μmol h <sup>-1</sup>                   | 62.1% (420 nm) | 6    |
| g-C <sub>3</sub> N <sub>4</sub> /WO <sub>3</sub>                            | 3 wt% Pt    | Solid-state synthesis           | 300 W Xe lamp, λ > 420 nm, triethanolamine solution                                          | H <sub>2</sub> : 326 μmol h <sup>-1</sup>                    | 3.9% (420 nm)  | 7    |
| g-C <sub>3</sub> N <sub>4</sub> /WO <sub>3</sub>                            | 2 wt% Pt    | Solid-state synthesis           | 300 W Xe lamp, λ > 420 nm, triethanolamine solution                                          | H <sub>2</sub> : 66 μmol h <sup>-1</sup> g <sup>-1</sup>     | 0.9% (405 nm)  | 8    |
| W <sub>18</sub> O <sub>49</sub> /g-C <sub>3</sub> N <sub>4</sub>            | 3 wt% Pt    | Hydrothermal                    | 300 W Xe lamp, λ > 420 nm, triethanolamine solution                                          | 3.69 μmol h <sup>-1</sup>                                    | 1.79% (400 nm) | 9    |
| W <sub>18</sub> O <sub>49</sub> /g-C <sub>3</sub> N <sub>4</sub>            | 1 wt% Pt    | Solvothermal                    | 300 W Xe lamp, solar filter (AM 1.5), triethanolamine solution                               | 15.2 μmol h <sup>-1</sup>                                    |                | 10   |
| CdS/SiC                                                                     | 3 wt% Pt    | Deposition-precipitation        | 300 W Xe lamp, λ > 420 nm, 0.1 M Na <sub>2</sub> S and 0.1 M Na <sub>2</sub> SO <sub>3</sub> | H <sub>2</sub> : 5460 μmol h <sup>-1</sup> g <sup>-1</sup>   | 2.1% (420 nm)  | 11   |
| CdS/SiC                                                                     | No          | Hydrothermal                    | 300 W Xe lamp, λ > 420 nm, 0.1 Na <sub>2</sub> S and 0.1 M Na <sub>2</sub> SO <sub>3</sub>   | H <sub>2</sub> : 363 μmol h <sup>-1</sup> g <sup>-1</sup>    |                | 12   |

|                                                                 |                                      |                           |                                                                      |                                                                                              |                                  |          |
|-----------------------------------------------------------------|--------------------------------------|---------------------------|----------------------------------------------------------------------|----------------------------------------------------------------------------------------------|----------------------------------|----------|
| CoTiO <sub>3</sub> /g-C <sub>3</sub> N <sub>4</sub>             | 3 wt% Pt                             | Solid-state synthesis     | 300 W Xe lamp, $\lambda > 400$ nm, ethanol solution                  | H <sub>2</sub> : 858 $\mu\text{mol h}^{-1} \text{g}^{-1}$                                    | 38.4% at 350 nm, 3.23% at 420 nm | 13       |
| Rh doped SrTiO <sub>3</sub> /BiVO <sub>4</sub>                  | 0.7 wt% Ru                           | Solid-state synthesis     | 300 W Xe lamp, 400 nm < $\lambda$ < 800 nm, pure water               | H <sub>2</sub> : 47.2 $\mu\text{mol h}^{-1}$<br>O <sub>2</sub> : 22.4 $\mu\text{mol h}^{-1}$ | 1.6% (420 nm)                    | 14       |
| Black phosphorus/BiVO <sub>4</sub>                              | 5 wt% Co <sub>3</sub> O <sub>4</sub> | Self-assembly             | 320 W Xenon lamp, $\lambda > 420$ nm, pure water                     | H <sub>2</sub> : 160 $\mu\text{mol h}^{-1}$<br>O <sub>2</sub> : 102 $\mu\text{mol h}^{-1}$   | 0.89% (420 nm)                   | 15       |
| TiO <sub>2</sub> /CdS                                           | 1 wt% Pt                             | Photoreduction-deposition | 300 W Xe lamp, $\lambda > 400$ nm, 20 vol% methanol aqueous solution | H <sub>2</sub> : 133.6 $\mu\text{mol g}^{-1} \text{h}^{-1}$                                  | 3.2 % (400 nm)                   | Our work |
| Fe <sub>2</sub> O <sub>3</sub> /g-C <sub>3</sub> N <sub>4</sub> | 1 wt% Pt                             | Photooxidation-deposition | 300 W Xe lamp, $\lambda > 420$ nm, 10 vol% triethanolamine solution  | H <sub>2</sub> : 584 $\mu\text{mol g}^{-1} \text{h}^{-1}$                                    | 17% (380 nm)                     | Our work |

## References

1. W. Jiang, X. Zong, L. An, S. Hua, X. Miao, S. Luan, Y. Wen, F. F. Tao and Z. Sun, *ACS Catal.*, 2018, **8**, 2209-2217.
2. J. Jin, J. Yu, D. Guo, C. Cui and W. Ho, *Small*, 2015, **11**, 5262-5271.
3. F. Xu, W. Xiao, B. Cheng and J. Yu, *Int. J. Hydrogen Energ.*, 2014, **39**, 15394-15402.
4. H. Gao, P. Zhang, J. Hu, J. Pan, J. Fan and G. Shao, *Appl. Surf. Sci.*, 2017, **391**, 211-217.
5. H. Gao, P. Zhang, J. Zhao, Y. Zhang, J. Hu and G. Shao, *Appl. Catal. B: Environ.*, 2017, **210**, 297-305.
6. H.-L. Guo, H. Du, Y.-F. Jiang, N. Jiang, C.-C. Shen, X. Zhou, Y.-N. Liu and A.-W. Xu, *J. Phys. Chem. C*, 2017, **121**, 107-114.
7. K. Kailasam, A. Fischer, G. Zhang, J. Zhang, M. Schwarze, M. Schröder, X. Wang, R. Schomäcker and A. Thomas, *ChemSusChem*, 2015, **8**, 1404-1410.
8. H. Katsumata, Y. Tachi, T. Suzuki and S. Kaneco, *RSC Adv.*, 2014, **4**, 21405-21409.
9. K. Song, F. Xiao, L. Zhang, F. Yue, X. Liang, J. Wang and X. Su, *J. Mol. Catal. A: Chem.*, 2016, **418-419**, 95-102.
10. Z. Zhang, J. Huang, Y. Fang, M. Zhang, K. Liu and B. Dong, *Adv. Mater.*, 2017, **29**, 1606688.
11. Y. Peng, Z. Guo, J. Yang, D. Wang and W. Yuan, *J. Mater. Chem. A*, 2014, **2**, 6296-6300.
12. Y. Peng, Z. Guo, D. Wang, N. Pan and W. Yuan, *Appl. Phys. Lett.*, 2015, **107**, 012102.
13. R. Ye, H. Fang, Y.-Z. Zheng, N. Li, Y. Wang and X. Tao, *ACS Appl. Mater. & Inter.*, 2016, **8**, 13879-13889.
14. Q. Jia, A. Iwase and A. Kudo, *Chem. Sci.*, 2014, **5**, 1513-1519.
15. M. Zhu, Z. Sun, M. Fujitsuka and T. Majima, *Angew. Chem. Int. Edit.*, 2018, **57**, 2160-2164.
